# Supplementary material for: Three β-octamolybdate-based supramolecular hybrids constructed from a bis-imidazolyl-bis-amide ligand: fast and selective adsorption activities of organic dyes
Source: Royal Society of Chemistry journal article supplement (doi:10.1039/c6nj03573f), 2017-01-01
Supplement: c6nj03573f1.pdf [file c6nj03573f1.pdf]

# Three $\beta$ -Octamolybdate-based Supramolecular Hybrids Constructed from a Bis-imidazolyl-bis-amide Ligand: Fast and Selective Adsorption Activities of Organic Dyes

Xiu-Li Wang\*, Shan Zhang, Xiang Wang, Hui-Xiu Zhang, Na Xu, Tian-Jiao Li

*Department of Chemistry, Bohai University, Jinzhou, 121000, P. R. China.*

**Table S1** Selected hydrogen bonding geometry ( $\text{\AA}$ ,  $^\circ$ ) for compound **1**.

| D-H...A             | D-H / $\text{\AA}$ | H...A / $\text{\AA}$ | D...A / $\text{\AA}$ | D-H...A / $^\circ$ |
|---------------------|--------------------|----------------------|----------------------|--------------------|
| O(1)-H(2WA)...O(2W) | 0.85               | 2.20                 | 3.021                | 160                |
| N(4)-H(4C)...O(2W)  | 0.86               | 2.16                 | 2.903                | 145                |
| N(6)-H(6B)...O(8)   | 0.86               | 2.19                 | 3.009                | 160                |

**Table S2** Selected hydrogen bonding geometry ( $\text{\AA}$ ,  $^\circ$ ) for compound **3**.

| D-H...A             | D-H / $\text{\AA}$ | H...A / $\text{\AA}$ | D...A / $\text{\AA}$ | D-H...A / $^\circ$ |
|---------------------|--------------------|----------------------|----------------------|--------------------|
| N(10)-H(6C)...O(24) | 0.86               | 2.10                 | 2.949                | 169                |
| N(11)-H(5C)...O(32) | 0.86               | 2.05                 | 2.910                | 176                |
| N(9)-H(9A)...O(19)  | 0.86               | 2.13                 | 2.965                | 162                |

**Table S3** Selected bond distances ( $\text{\AA}$ ) and angles ( $^\circ$ ) for compounds **1-3**.

| Compound <b>1</b> |           |               |          |
|-------------------|-----------|---------------|----------|
| Mo(1)-O(9)        | 1.696(2)  | Mo(2)-O(13)   | 1.918(2) |
| Mo(1)-O(8)        | 1.759(2)  | Mo(2)-O(8)    | 2.264(2) |
| Mo(1)-O(16)#1     | 1.926(2)  | Mo(2)-O(11)#1 | 2.513(2) |
| Mo(1)-O(15)       | 1.962(2)  | O(16)-Mo(1)#1 | 1.926(2) |
| Mo(1)-O(11)       | 2.109(2)  | O(16)-Mo(3)   | 2.014(2) |
| Mo(1)-O(11)#1     | 2.371(2)  | O(16)-Mo(4)   | 2.397(2) |
| Mo(1)-Mo(4)       | 3.2064(4) | Mo(3)-O(5)    | 1.692(3) |
| Co(1)-N(2)        | 2.049(3)  | Mo(3)-O(4)    | 1.706(3) |
| Co(1)-N(1)        | 2.099(3)  | Mo(3)-O(13)   | 1.886(2) |
| Co(1)-O(1W)       | 2.125(3)  | Mo(3)-O(11)#1 | 2.371(2) |
| Co(1)-O(3)        | 2.128(3)  | Mo(4)-O(10)   | 1.694(3) |
| Co(1)-O(2)        | 2.132(2)  | Mo(4)-O(14)   | 1.713(3) |
| Co(1)-O(1)        | 2.189(3)  | Mo(4)-O(6)#1  | 1.897(2) |
| O(15)-Mo(4)       | 1.998(2)  | Mo(4)-O(11)   | 2.286(2) |
| O(15)-Mo(3)       | 2.311(2)  | O(6)-Mo(4)#1  | 1.897(2) |
| Mo(2)-O(7)        | 1.682(3)  | O(11)-Mo(3)#1 | 2.371(2) |

|                  |            |                  |            |
|------------------|------------|------------------|------------|
| Mo(2)-O(2)       | 1.727(2)   | O(11)-Mo(1)#1    | 2.371(2)   |
| Mo(2)-O(6)       | 1.910(2)   | O(11)-Mo(2)#1    | 2.513(2)   |
| N(2)-Co(1)-N(1)  | 176.77(12) | O(3)-Co(1)-O(2)  | 90.67(10)  |
| N(2)-Co(1)-O(1W) | 90.19(12)  | N(2)-Co(1)-O(1)  | 77.49(11)  |
| N(1)-Co(1)-O(1W) | 87.68(12)  | N(1)-Co(1)-O(1)  | 105.04(11) |
| N(2)-Co(1)-O(3)  | 103.94(11) | O(1W)-Co(1)-O(1) | 92.85(10)  |
| N(1)-Co(1)-O(3)  | 78.31(11)  | O(3)-Co(1)-O(1)  | 87.77(10)  |
| O(1W)-Co(1)-O(3) | 165.63(10) | O(2)-Co(1)-O(1)  | 165.13(10) |
| N(2)-Co(1)-O(2)  | 88.56(11)  |                  |            |
| N(1)-Co(1)-O(2)  | 89.09(11)  |                  |            |
| O(1W)-Co(1)-O(2) | 92.31(10)  |                  |            |

Symmetry codes for **1**: #1 - x + 1, - y + 1, - z - 1.

### Compound 2

|                  |            |                  |            |
|------------------|------------|------------------|------------|
| Mo(1)-O(11)      | 1.693(4)   | Mo(2)-O(14)      | 2.520(3)   |
| Mo(1)-O(12)      | 1.764(3)   | Mo(3)-O(8)       | 1.695(4)   |
| Mo(1)-O(20)#1    | 1.926(3)   | Mo(3)-O(7)       | 1.706(4)   |
| Mo(1)-O(13)      | 1.964(4)   | Mo(3)-O(15)      | 1.892(4)   |
| Mo(1)-O(14)#1    | 2.109(3)   | Mo(3)-O(20)      | 2.018(3)   |
| Mo(1)-O(14)      | 2.372(3)   | Mo(3)-O(13)      | 2.312(3)   |
| Mo(1)-Mo(4)      | 3.2133(7)  | Mo(3)-O(14)      | 2.355(3)   |
| Zn(1)-N(1)       | 2.017(4)   | Mo(4)-O(10)      | 1.693(4)   |
| Zn(1)-N(3)       | 2.073(4)   | Mo(4)-O(9)       | 1.707(4)   |
| Zn(1)-O(1W)      | 2.149(4)   | Mo(4)-O(17)#1    | 1.894(4)   |
| Zn(1)-O(1)       | 2.173(4)   | Mo(4)-O(13)      | 2.001(3)   |
| Zn(1)-O(6)       | 2.204(4)   | Mo(4)-O(14)#1    | 2.299(3)   |
| Zn(1)-O(2)       | 2.217(4)   | Mo(4)-O(20)      | 2.405(3)   |
| Mo(2)-O(16)      | 1.689(4)   | O(14)-Mo(1)#1    | 2.109(3)   |
| Mo(2)-O(6)       | 1.724(4)   | O(14)-Mo(4)#1    | 2.299(3)   |
| Mo(2)-O(17)      | 1.910(4)   | O(17)-Mo(4)#1    | 1.894(4)   |
| Mo(2)-O(15)      | 1.919(3)   | O(20)-Mo(1)#1    | 1.926(3)   |
| Mo(2)-O(12)      | 2.262(3)   | N(3)-Zn(1)-O(2)  | 106.01(16) |
| N(1)-Zn(1)-N(3)  | 176.03(18) | O(1W)-Zn(1)-O(2) | 94.11(15)  |
| N(1)-Zn(1)-O(1W) | 90.76(16)  | O(1)-Zn(1)-O(2)  | 88.44(15)  |
| N(3)-Zn(1)-O(1W) | 88.30(16)  | O(6)-Zn(1)-O(2)  | 163.25(13) |
| N(1)-Zn(1)-O(1)  | 102.33(16) |                  |            |
| N(3)-Zn(1)-O(1)  | 78.66(16)  |                  |            |
| O(1W)-Zn(1)-O(1) | 166.91(14) |                  |            |
| N(1)-Zn(1)-O(6)  | 86.41(15)  |                  |            |
| N(3)-Zn(1)-O(6)  | 89.77(16)  |                  |            |
| O(1W)-Zn(1)-O(6) | 91.91(14)  |                  |            |
| O(1)-Zn(1)-O(6)  | 89.23(15)  |                  |            |
| N(1)-Zn(1)-O(2)  | 77.90(15)  |                  |            |

Symmetry codes for **2**: #1 - x, - y + 1, - z.

### Compound 3

|                 |           |                  |           |
|-----------------|-----------|------------------|-----------|
| Mo(1)-O(18)     | 1.692(5)  | Mo(4)-Mo(3)#2    | 3.2083(9) |
| Mo(1)-O(17)     | 1.753(4)  | Mo(5)-O(32)      | 1.692(5)  |
| Mo(1)-O(21)#1   | 1.946(4)  | Mo(5)-O(16)      | 1.695(5)  |
| Mo(1)-O(5)      | 1.950(5)  | Mo(5)-O(12)      | 1.895(5)  |
| Mo(1)-O(15)     | 2.146(4)  | Mo(5)-O(5)       | 2.005(4)  |
| Mo(1)-O(15)#1   | 2.403(4)  | Mo(5)-O(15)      | 2.315(4)  |
| Mo(1)-Mo(2)#1   | 3.2108(9) | Mo(5)-O(21)      | 2.360(4)  |
| Cu(1)-N(1)      | 1.902(6)  | Mo(6)-O(27)      | 1.688(5)  |
| Cu(1)-N(2)      | 1.918(6)  | Mo(6)-O(28)      | 1.699(5)  |
| Cu(1)-O(1)      | 1.965(5)  | Mo(6)-O(26)      | 1.875(5)  |
| Cu(1)-O(2)      | 1.967(5)  | Mo(6)-O(29)      | 2.007(4)  |
| Mo(2)-O(13)     | 1.695(5)  | Mo(6)-O(30)      | 2.393(5)  |
| Mo(2)-O(9)      | 1.719(5)  | Mo(6)-O(25)      | 2.395(5)  |
| Mo(2)-O(10)     | 1.888(4)  | Mo(7)-O(8)       | 1.682(5)  |
| Mo(2)-O(21)     | 1.985(4)  | Mo(7)-O(7)       | 1.707(5)  |
| Mo(2)-O(15)#1   | 2.315(4)  | Mo(7)-O(12)#1    | 1.933(5)  |
| Mo(2)-O(5)      | 2.347(5)  | Mo(7)-O(10)      | 1.934(5)  |
| Mo(2)-Mo(1)#1   | 3.2108(9) | Mo(7)-O(17)      | 2.296(5)  |
| Cu(2)-N(5)      | 1.951(6)  | Mo(7)-O(15)#1    | 2.492(4)  |
| Cu(2)-N(6)      | 1.958(6)  | Mo(8)-O(14)      | 1.690(5)  |
| Cu(2)-O(4)      | 1.980(5)  | Mo(8)-O(20)      | 1.694(6)  |
| Cu(2)-O(3)      | 1.981(5)  | Mo(8)-O(26)#2    | 1.905(5)  |
| Cu(2)-O(5W)     | 2.357(6)  | Mo(8)-O(23)      | 1.964(5)  |
| Mo(3)-O(11)     | 1.691(5)  | Mo(8)-O(19)      | 2.319(5)  |
| Mo(3)-O(19)     | 1.765(4)  | Mo(8)-O(30)#2    | 2.474(4)  |
| Mo(3)-O(25)#2   | 1.935(4)  | O(12)-Mo(7)#1    | 1.933(5)  |
| Mo(3)-O(29)     | 1.953(4)  | O(15)-Mo(2)#1    | 2.315(4)  |
| Mo(3)-O(30)     | 2.123(4)  | O(15)-Mo(1)#1    | 2.403(4)  |
| Mo(3)-O(30)#2   | 2.393(5)  | O(15)-Mo(7)#1    | 2.492(4)  |
| Mo(3)-Mo(4)#2   | 3.2082(9) | O(21)-Mo(1)#1    | 1.946(4)  |
| Mo(4)-O(31)     | 1.706(5)  | O(25)-Mo(3)#2    | 1.935(4)  |
| Mo(4)-O(24)     | 1.715(5)  | O(26)-Mo(8)#2    | 1.905(5)  |
| Mo(4)-O(23)     | 1.877(5)  | O(30)-Mo(4)#2    | 2.310(5)  |
| Mo(4)-O(25)     | 1.989(4)  | O(30)-Mo(3)#2    | 2.393(5)  |
| Mo(4)-O(30)#2   | 2.310(5)  | O(30)-Mo(8)#2    | 2.474(4)  |
| Mo(4)-O(29)     | 2.337(5)  | O(4)-Cu(2)-O(3)  | 179.4(3)  |
| N(1)-Cu(1)-N(2) | 176.2(3)  | N(5)-Cu(2)-O(5W) | 103.5(2)  |
| N(1)-Cu(1)-O(1) | 83.4(2)   | N(6)-Cu(2)-O(5W) | 89.3(3)   |
| N(2)-Cu(1)-O(1) | 98.6(2)   | O(4)-Cu(2)-O(5W) | 86.3(2)   |
| N(1)-Cu(1)-O(2) | 94.0(2)   | O(3)-Cu(2)-O(5W) | 94.3(2)   |
| N(2)-Cu(1)-O(2) | 83.8(2)   |                  |           |
| O(1)-Cu(1)-O(2) | 176.1(2)  |                  |           |
| N(5)-Cu(2)-N(6) | 167.2(3)  |                  |           |
| N(5)-Cu(2)-O(4) | 96.7(2)   |                  |           |

N(6)-Cu(2)-O(4) 83.1(2)

N(5)-Cu(2)-O(3) 83.2(2)

N(6)-Cu(2)-O(3) 96.8(2)

---

Symmetry codes for **3**: #1  $-x, -y + 1, -z + 1$ ; #2  $-x + 1, -y + 1, -z$ .

---

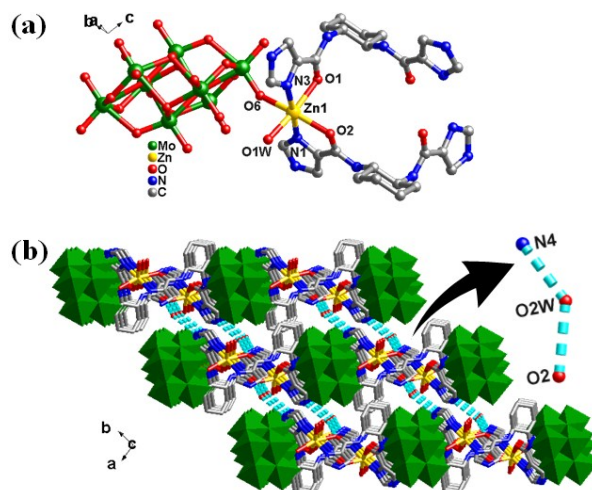

**Fig.S1** (a) Stick/ball view of the asymmetric unit of **2**. The hydrogen atoms are omitted for clarity.

(b) View of the 3D supramolecular structure of **2**.

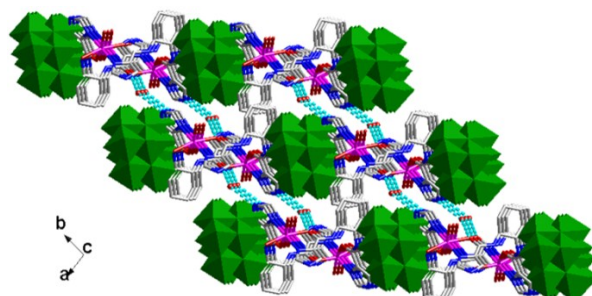

**Fig.S2** View of the 3D supramolecular structure of **1**.

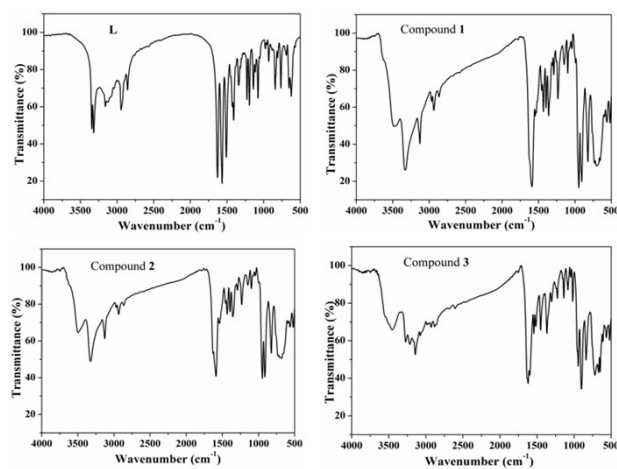

**Fig.S3** The IR spectra of compounds **1–3** and **L**.

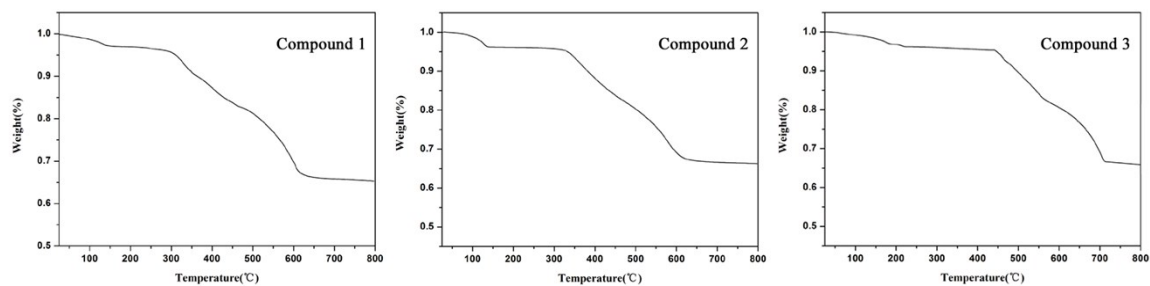

**Fig.S4** The thermogravimetric (TG) curves of compounds 1–3.

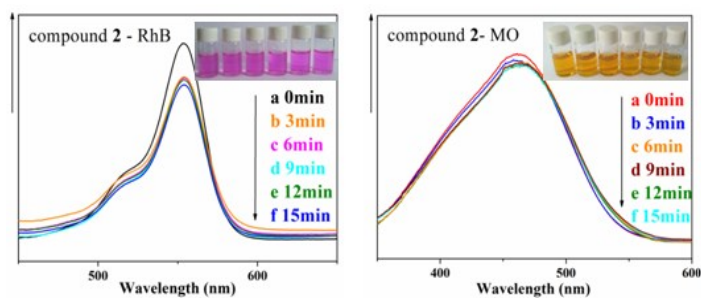

**Fig.S5** The UV absorption curves of RhB and MO with 2.

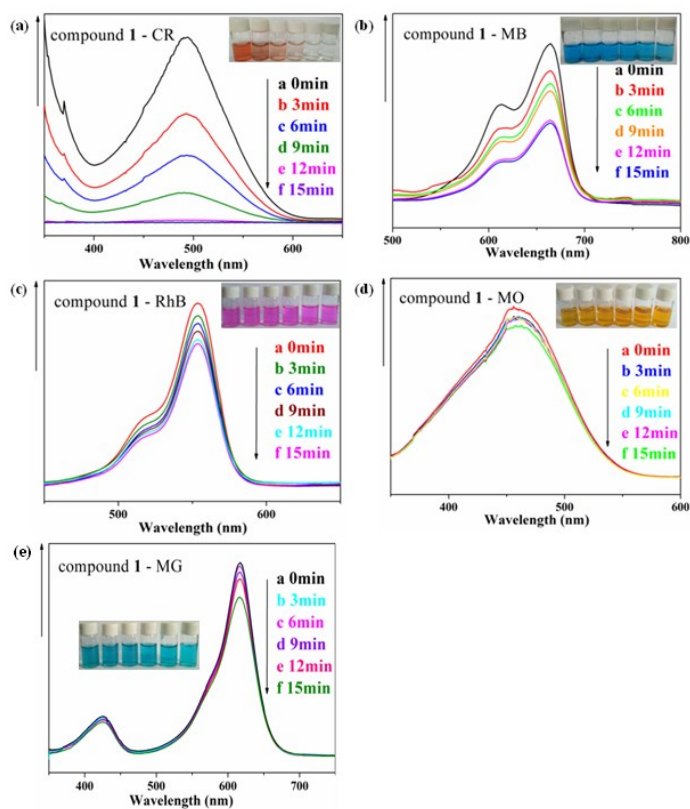

**Fig.S6** (a-e) The UV absorption curves of CR, MB, RhB, MO and MG with 1.

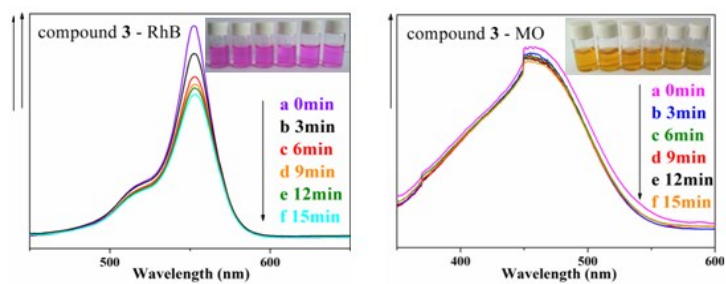

**Fig.S7** The UV absorption curves of RhB and MO with **3**; The inserted photographs show the change of solution colors with the increase of time.
